# Supplementary material for: Magnitude and determinants of drug therapy problems among type 2 diabetes mellitus patients with hypertension in Ethiopia
Source: PubMed Central journal article supplement — SAGE Open Med. 2020 Sep 23;8:2050312120954695. doi: 10.1177/2050312120954695 (PMC7520926; doi:10.1177/2050312120954695), 2020-09-23
Supplement: Data_collection_tool.pdf [file Data_collection_tool.pdf]

**Data collection tool**

**I. Socio-demographic characteristics of the patients**

**Patient Study Number:** \_\_\_\_\_ **Age in year:** \_\_\_\_\_

**Sex**

- A. Male
- B. Female

**Marital status**

- A. Single
- B. Married
- C. Divorced
- D. Widowed

**Occupational status**

- A. Farmer
- B. Employed
- C. Merchant
- D. Housewife
- E. Retired

**Educational Status**

- A. No formal education
- B. Primary (1–8)
- C. Secondary (9–12)
- D. College/University

**Monthly Family Income (in Ethiopian Birr)**

- A. Very low ( $\leq 860$ )
- B. Low (861-3000)
- C. Average (3001-5000)
- D. High ( $\geq 5001$ )

**History of smoking status**

- A. Smoker
- B. Non-smoker

**History of alcohol consumption**

- A. Yes
- B. No

**II. Clinical characteristics of the study participants**

1. Duration of the disease (years):\_\_\_\_\_
2. Prior history of hospitalization: Yes\_\_\_\_\_ No\_\_\_\_\_
3. Presence of concurrent comorbidities other than hypertension: Yes\_\_\_\_\_ No\_\_\_\_\_. If yes, (specify):\_\_\_\_\_
4. Fasting blood sugar level of the patient in the last visit (mg/dL):\_\_\_\_\_
5. Blood pressure of the patient in the last visit (mmHg):\_\_\_\_\_
6. Treatment regimens of the patient (drug, dose, frequency and duration of treatment)

---

---

---

---

---

---

---

---

7. Number of medications per patient: \_\_\_\_\_.
8. Is there any drug therapy problem present? Yes\_\_\_No\_\_\_\_. If yes, specify the number\_\_\_\_\_
9. Is there any need for additional drug therapy? Yes\_\_\_ No\_\_\_\_. If yes, what is the cause of this problem?
  - A. Preventive drug therapy required
  - B. A medical condition that requires treatment
  - C. To attain synergistic effect

10. Is there any unnecessary drug therapy in the treatment regimen? Yes\_\_\_ No\_\_\_. If yes, what is the cause of this problem?
- A. Duplication drug therapy
  - B. No valid medical indication for the drug therapy at this time
11. Is there any ineffective drug therapy in the treatment regimen? Yes\_\_\_ No\_\_\_.If yes, what is the cause of this problem? \_\_\_\_\_
12. Is the dose too low? Yes\_\_\_\_\_NO\_\_\_\_\_. If yes, what is the cause of this problem?
- A. The dose is too low to produce the desired effect
  - B. The dosing is too infrequent to produce the desired effect
13. Is the dose too high? Yes\_\_\_\_\_NO\_\_\_\_\_
14. Is there any adverse drug reaction? Yes \_\_\_\_\_ No\_\_\_\_\_ If yes, what is the cause of this problem?
- A. Undesirable drug effect
  - B. Unsafe or the patient/contraindication
15. Is there any non-compliance to their treatment regimen by the patient? Yes\_\_\_ No\_\_\_\_\_. If yes to this questions, what are the main reasons of non-compliance?
- A. Forgets to take medications
  - B. Drug product too expensive for the patient
  - C. Does not understand the instruction
  - D. Cannot swallow or self-administer the drug product appropriately
  - E. The drug product is not available for the patient
