# Supplementary material for: Magnitude and determinants of drug therapy problems among type 2 diabetes mellitus patients with hypertension in Ethiopia
Source: PubMed Central journal article supplement — SAGE Open Med. 2020 Sep 23;8:2050312120954695. doi: 10.1177/2050312120954695 (PMC7520926; doi:10.1177/2050312120954695), 2020-09-23
Supplement: Supplemental_material.pdf [file Supplemental_material.pdf]

### Components of drug therapy problems (DTPs)

| Components of DTPs          | Subclassifications                            | Causes of drug therapy problem                                                                                                                                                                                                                                                                                                                                                                                                   |
|-----------------------------|-----------------------------------------------|----------------------------------------------------------------------------------------------------------------------------------------------------------------------------------------------------------------------------------------------------------------------------------------------------------------------------------------------------------------------------------------------------------------------------------|
| Indication-related problems | Unnecessary drug therapy                      | <ul style="list-style-type: none"> <li>• there is no valid medical indication for the drug therapy at this time</li> <li>• multiple drug products are being used for a condition that requires single drug therapy</li> <li>• the medical condition is more appropriately treated with nondrug therapy</li> <li>• the drug therapy is used to treat an avoidable adverse reaction associated with another medication.</li> </ul> |
|                             | Need for additional drug therapy              | <ul style="list-style-type: none"> <li>• the medical condition requires the initiation of drug therapy</li> <li>• Preventive drug therapy is required to reduce the risk of developing a new condition</li> <li>• the medical condition requires additional drug therapy to achieve synergistic or additive effects.</li> </ul>                                                                                                  |
| Efficacy-related problems   | Ineffective drug therapy was considered when: | <ul style="list-style-type: none"> <li>• the least effective drug is used while the most effective drug is available</li> <li>• the drug is used for medical condition which is refractory to the drug product</li> <li>• the drug product used is not an effective product for the medical condition being treated</li> </ul>                                                                                                   |
|                             | Dosage too low was considered when:           | <ul style="list-style-type: none"> <li>• the dose of the drug is too low to produce the desired response</li> <li>• the drug interaction occurs that could reduce the amount of active drug available</li> <li>• the duration of drug therapy is too short to produce the desired response</li> <li>• the dosage interval is too infrequent to produce the desired response</li> </ul>                                           |
| Safety-related problems     | Dosage too high was considered when:          | <ul style="list-style-type: none"> <li>• the dose is too high</li> <li>• dosing frequency is too short</li> <li>• the duration of drug therapy is too long</li> <li>• the drug interaction occurs that could result in a toxic reaction to the drug product</li> <li>• the dose of the drug was administered too rapidly</li> </ul>                                                                                              |
|                             | Adverse drug reaction was considered when:    | <ul style="list-style-type: none"> <li>• the drug causes an undesirable reaction that was not dose-related</li> <li>• the drug interaction causes an undesirable reaction that is not dose-related</li> <li>• the drug causes an allergic reaction</li> </ul>                                                                                                                                                                    |

|                             |                                                                                                            |                                                                                                                                                                                                                                                                                                    |
|-----------------------------|------------------------------------------------------------------------------------------------------------|----------------------------------------------------------------------------------------------------------------------------------------------------------------------------------------------------------------------------------------------------------------------------------------------------|
|                             |                                                                                                            | <ul style="list-style-type: none"><li>• the drug is contraindicated due to risk factors</li><li>• the dosage regimen administered or changed too rapidly</li></ul>                                                                                                                                 |
| Compliance-related problems | It is considered if a patient fails to take medications appropriately due to one of the following reasons: | <ul style="list-style-type: none"><li>• lack of understanding the instructions</li><li>• preference not to take the medication</li><li>• forgetfulness</li><li>• inability to swallow or self-administer the drug product appropriately</li><li>• affordability and availability problem</li></ul> |
